# Supplementary material for: Zeolite Y-assisted nitration of aromatic and heterocyclic compounds and decarboxylative nitration of α,β-unsaturated acids under non-conventional conditions
Source: Royal Society of Chemistry journal article supplement (doi:10.1039/c5cy00919g), 2015-09-23
Supplement: c5cy00919g1.pdf [file c5cy00919g1.pdf]

**Zeolite Y assisted Nitration of Aromatic and Heterocyclic Compounds and Decarboxylative  
nitration of  $\alpha$ ,  $\beta$ - Unsaturated Acids under Nonconventional conditions**

**V. Sudhakar Chary<sup>a</sup>, K. C. Rajanna<sup>\*a</sup>, G. Krishnaiah<sup>a</sup>, P. Srinivas<sup>a</sup>**

<sup>a</sup>Department of Chemistry, Osmania University, Hyderabad-500 007, T.S. India

Email: [kcrajannaou@yahoo.com](mailto:kcrajannaou@yahoo.com)

**Supplementary Material**

**Spectra of some Represented compounds as Supporting Data:**

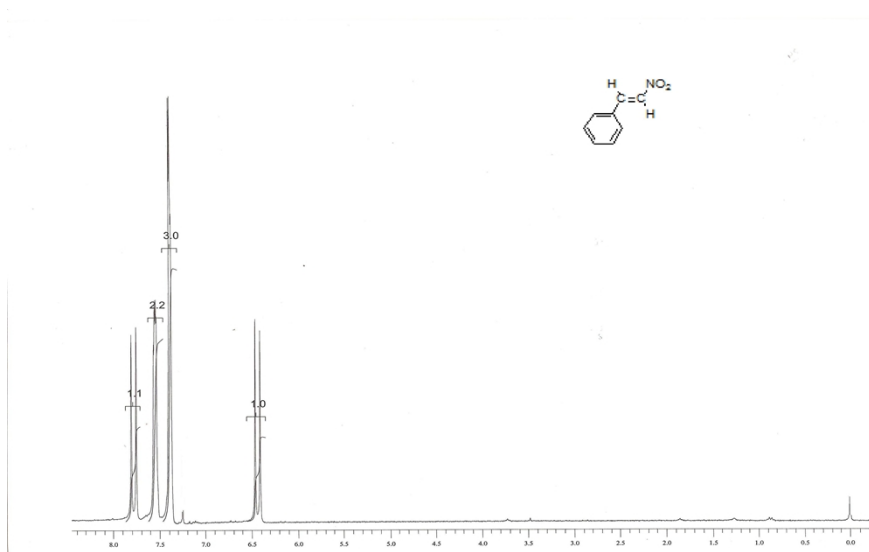

**Figure 1: <sup>1</sup>HNMR of  $\beta$  -Nitro Styrene**

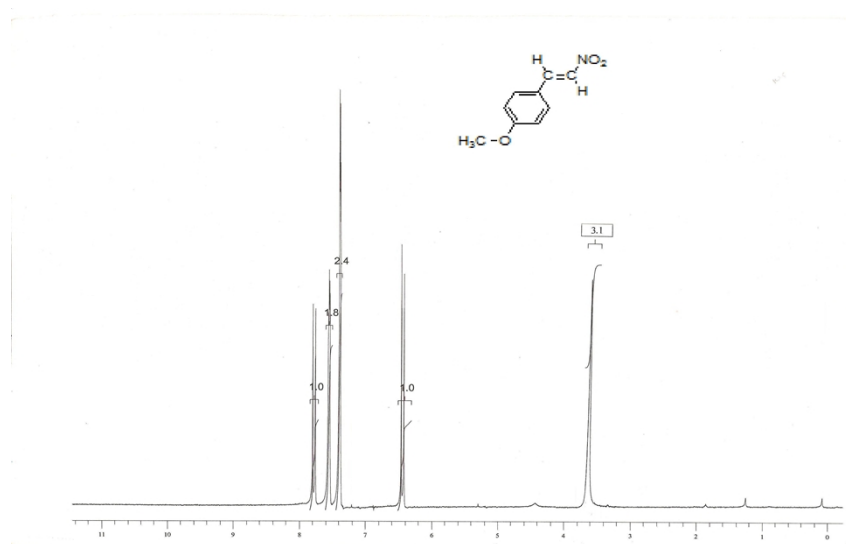

**Figure 2: <sup>1</sup>HNMR of 4-Methoxy  $\beta$  - Nitro Styrene**

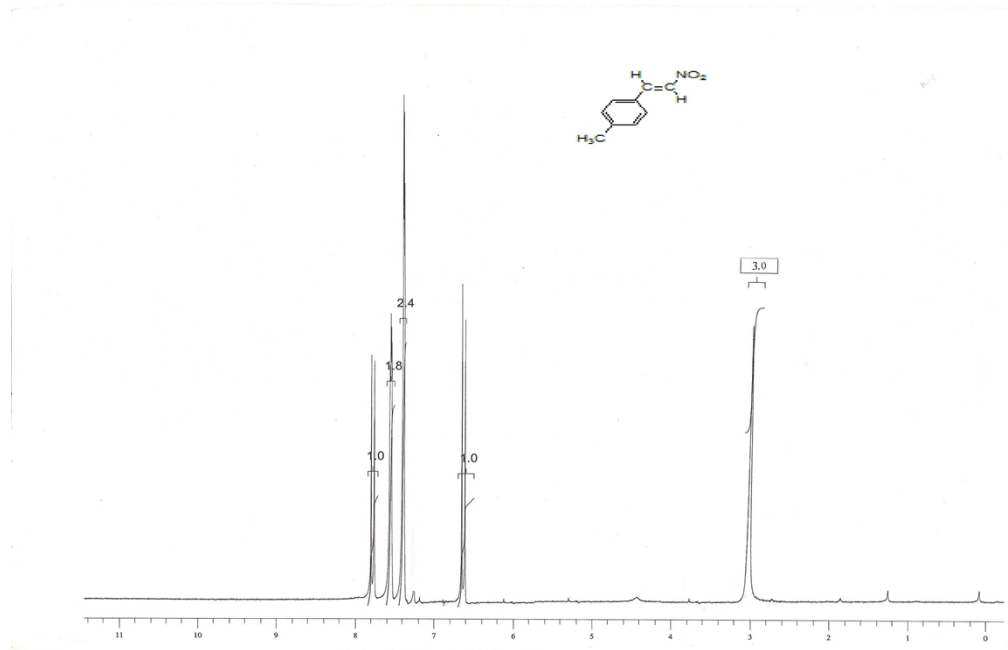

Figure 3: <sup>1</sup>H NMR of 4-Methyl β - Nitro Styrene

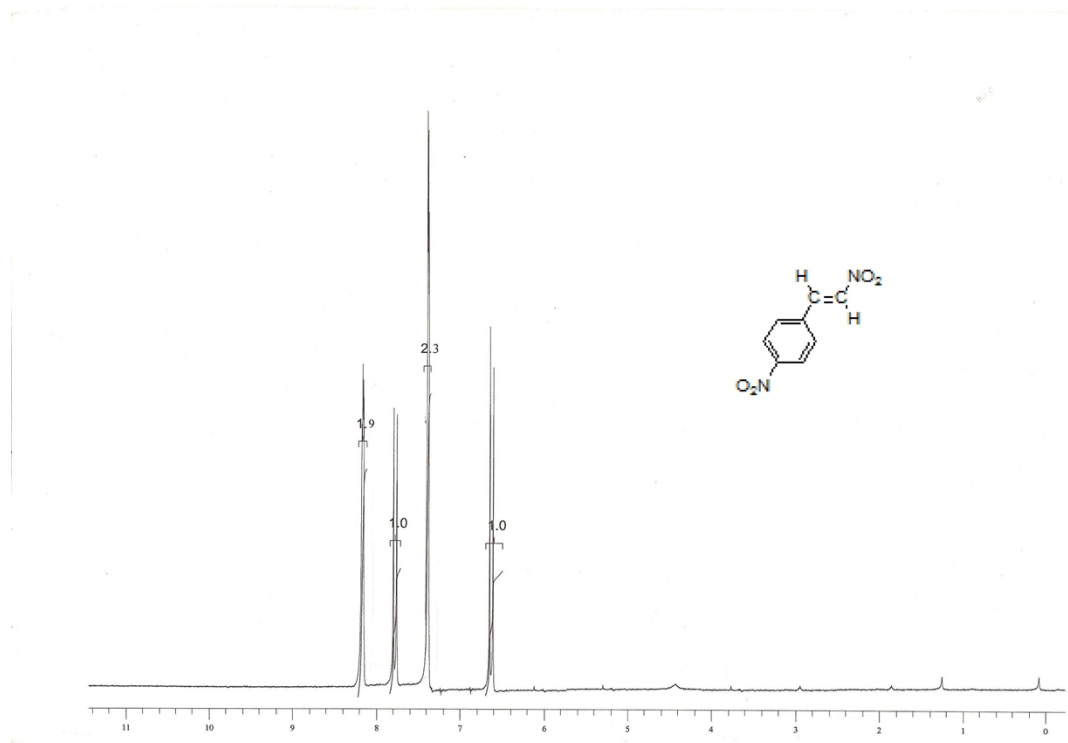

Figure 4: <sup>1</sup>H NMR of 4-Nitro β - Nitro Styrene

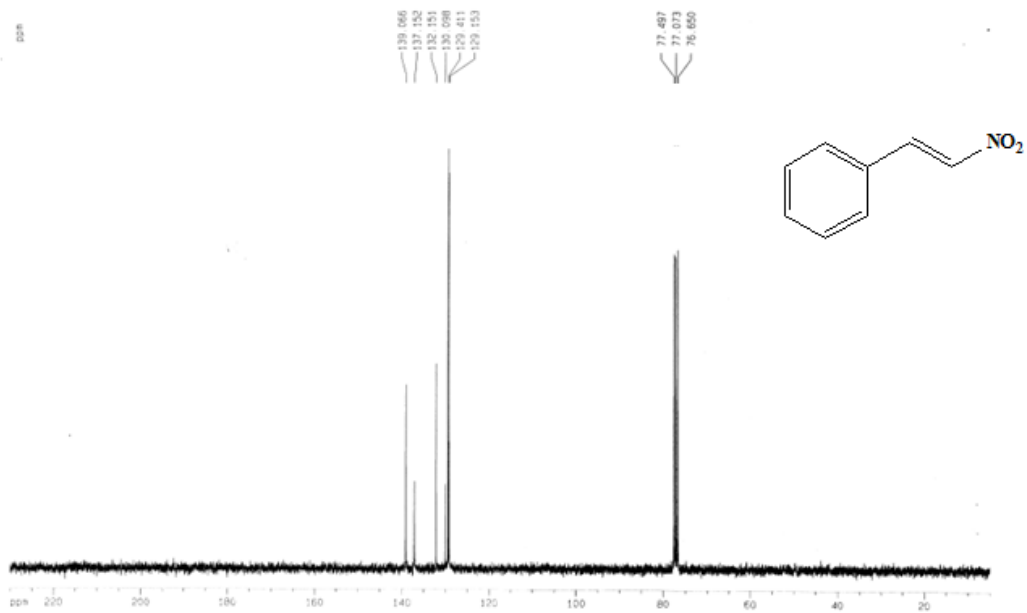

Figure 5:  $^{13}\text{C}$  NMR of  $\beta$ -Nitro Styrene

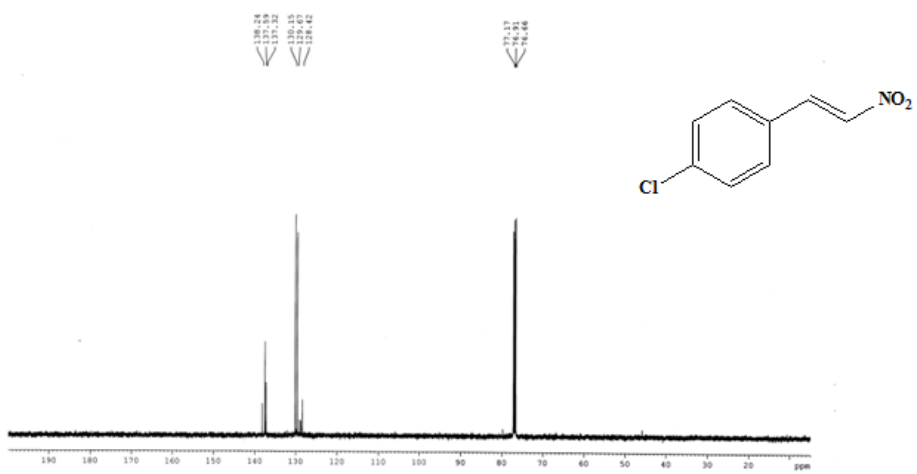

Figure 6:  $^{13}\text{C}$  NMR of 4-Chloro  $\beta$ -Nitro Styrene

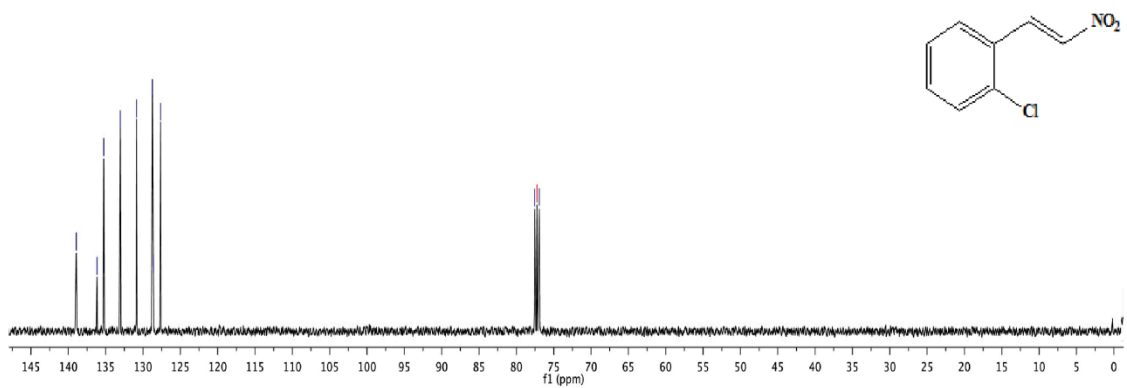

Figure 7: <sup>13</sup>C NMR of 2-Chloro β-Nitro Styrene

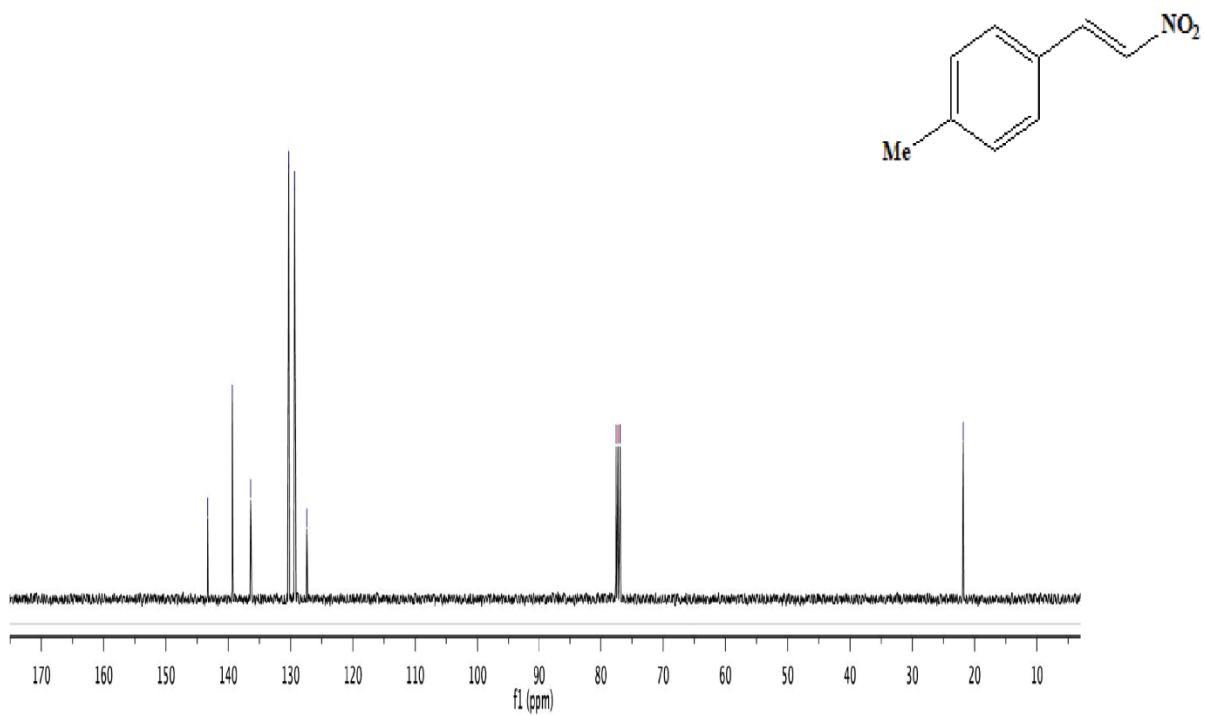

Figure 8: <sup>13</sup>C NMR of 4-Methyl β-Nitro Styrene

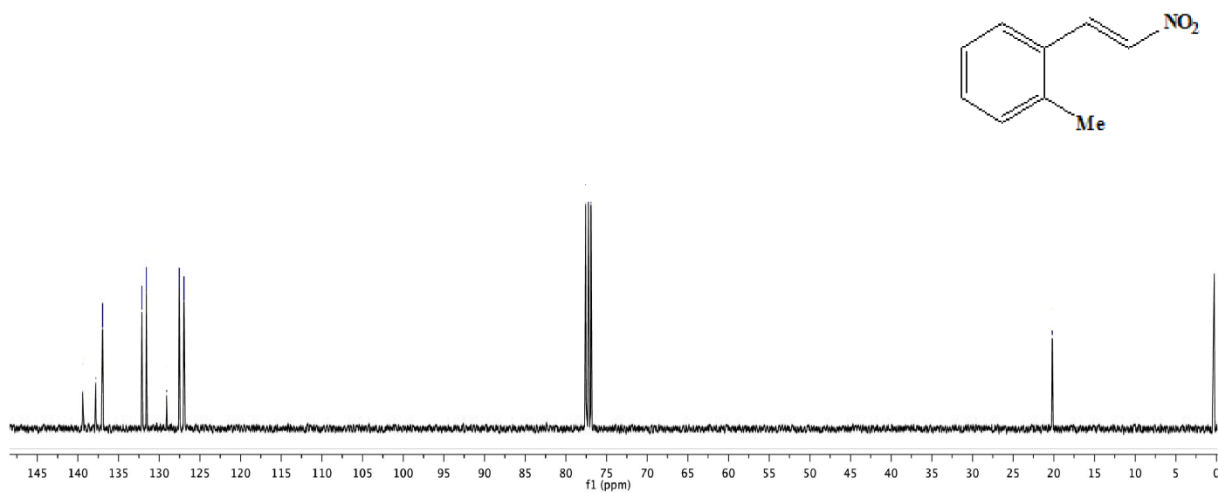

Figure 9:  $^{13}\text{C}$  NMR of 2- Methyl  $\beta$ -Nitro Styrene

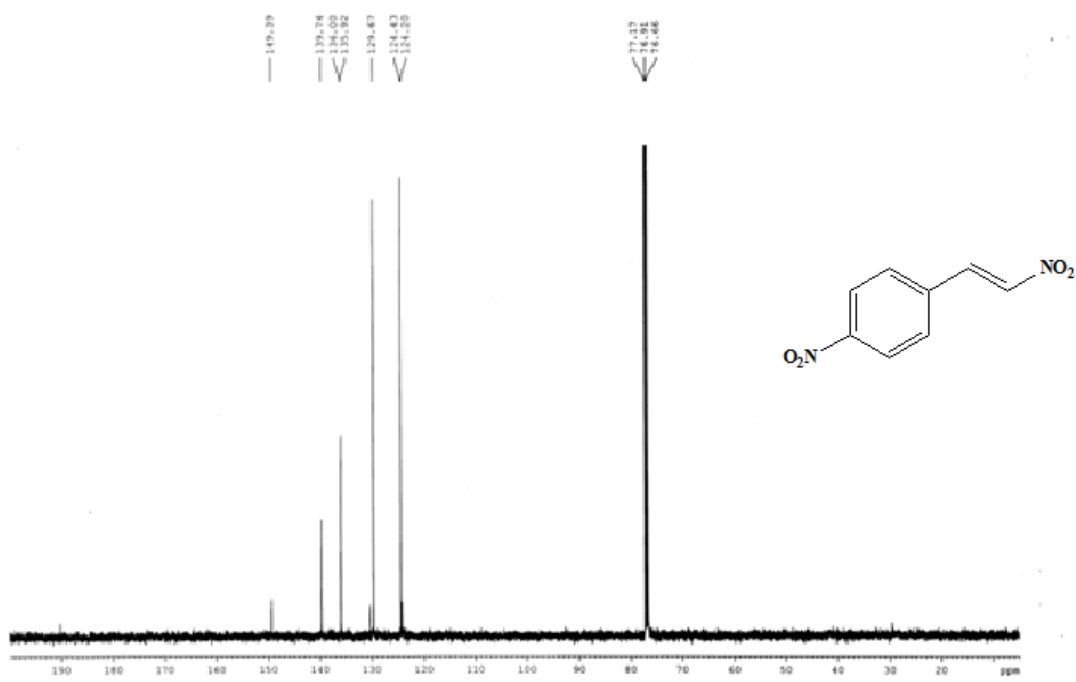

Figure 10:  $^{13}\text{C}$  NMR of 4- Nitro  $\beta$ -nitro Styrene

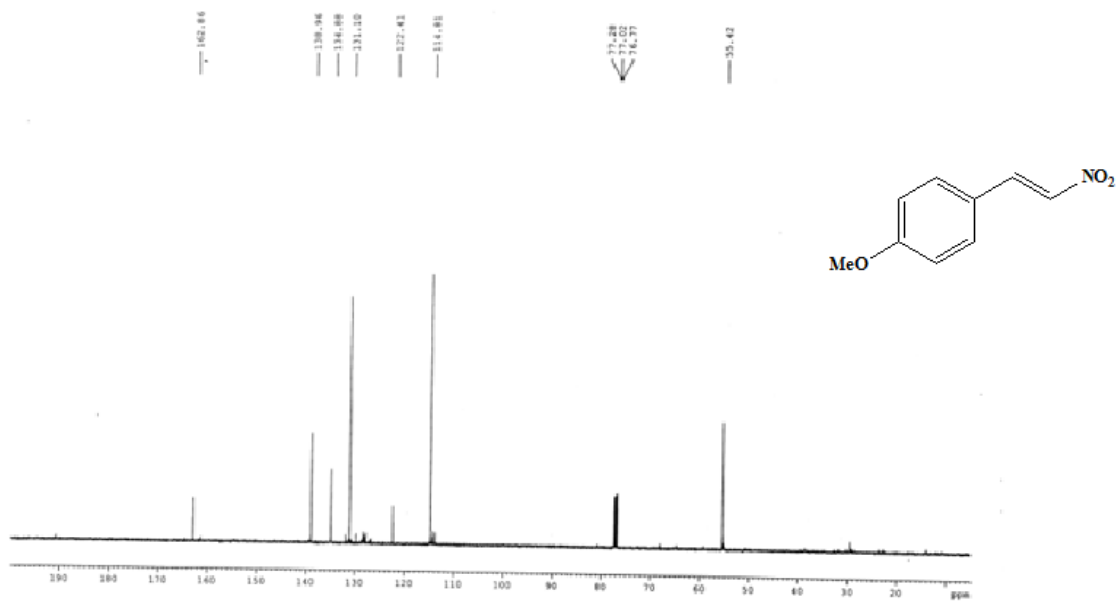

Figure 11:  $^{13}\text{C}$  NMR of 4- Methoxy  $\beta$ -Nitro Styrene

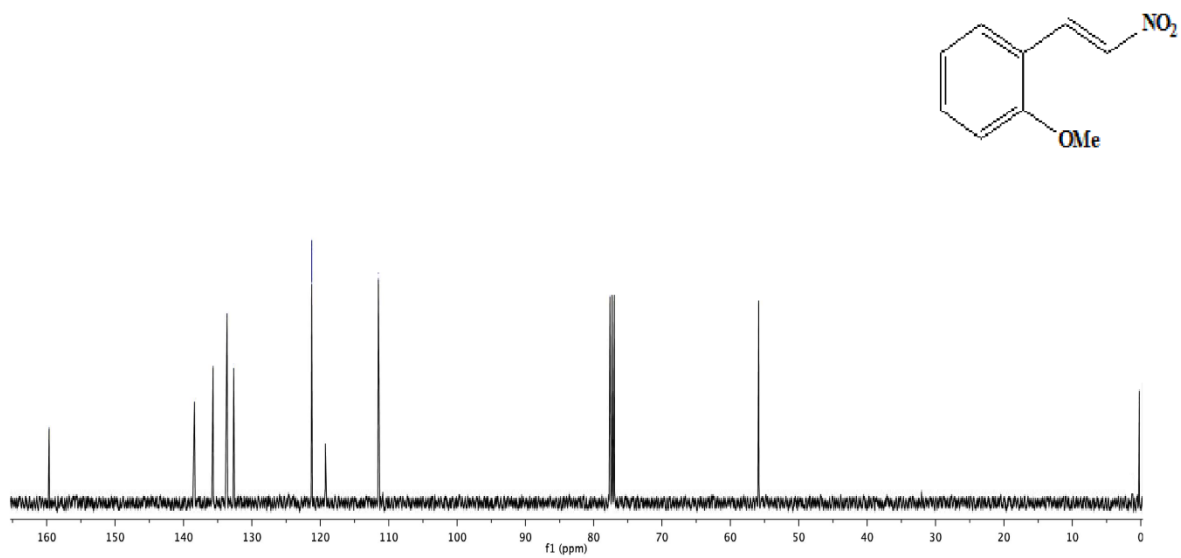

Figure 12:  $^{13}\text{C}$  NMR of 2- Methoxy  $\beta$ -Nitro Styrene
